# Supplementary material for: Using decision tree analysis to identify population groups at risk of subjective unmet need for assistance with activities of daily living
Source: Springer Nature journal article supplement (doi:10.1186/s12877-023-04238-w), 2023-09-07
Supplement: MOESM1 [file 26015898]

## Additional file 1: Descriptive statistics of included independent variables

Table 1: Numbers of observations and proportions of sociodemographic characteristics (unweighted)

|                                          | ADL  |      | IADL |      |
|------------------------------------------|------|------|------|------|
|                                          | N    | %    | N    | %    |
| <b>Gender identity</b>                   |      |      |      |      |
| male                                     | 804  | 41.3 | 1337 | 35.2 |
| female                                   | 1137 | 58.3 | 2447 | 64.4 |
| other                                    | 8    | 0.4  | 17   | 0.4  |
| <b>Age group</b>                         |      |      |      |      |
| 55-59                                    | 242  | 12.4 | 522  | 13.7 |
| 60-64                                    | 263  | 13.5 | 533  | 14.0 |
| 65-69                                    | 252  | 12.9 | 552  | 14.5 |
| 70-74                                    | 235  | 12.1 | 475  | 12.5 |
| 75-79                                    | 347  | 17.8 | 680  | 17.9 |
| 80-84                                    | 353  | 18.1 | 631  | 16.6 |
| 85-89                                    | 183  | 9.4  | 295  | 7.8  |
| over 90                                  | 74   | 3.8  | 113  | 3.0  |
| <b>Migrant status</b>                    |      |      |      |      |
| two-sided                                | 136  | 7.0  | 266  | 7.0  |
| none or one-sided                        | 1800 | 92.4 | 3508 | 92.3 |
| missing                                  | 13   | 0.7  | 27   | 0.7  |
| <b>Rurality of district of residence</b> |      |      |      |      |
| large city                               | 679  | 34.8 | 1268 | 33.4 |
| urban district                           | 657  | 33.7 | 1405 | 37.0 |
| rural district                           | 245  | 12.6 | 449  | 11.8 |
| sparsely populated rural district        | 232  | 11.9 | 417  | 11.0 |
| missing                                  | 136  | 7.0  | 262  | 6.9  |
| <b>Education (ISCED 11)</b>              |      |      |      |      |
| 1                                        | 10   | 0.5  | 13   | 0.3  |
| 2                                        | 206  | 10.6 | 360  | 9.5  |
| 3                                        | 802  | 41.1 | 1533 | 40.3 |
| 4                                        | 109  | 5.6  | 256  | 6.7  |
| 6                                        | 535  | 27.4 | 1041 | 27.4 |
| 7                                        | 228  | 11.7 | 491  | 12.9 |
| 8                                        | 50   | 2.6  | 94   | 2.5  |
| missing                                  | 9    | 0.5  | 13   | 0.3  |
| <b>Household income (quintiles)</b>      |      |      |      |      |
| 1 (low)                                  | 370  | 19.0 | 660  | 17.4 |
| 2                                        | 431  | 22.1 | 824  | 21.7 |
| 3                                        | 397  | 20.4 | 752  | 19.8 |
| 4                                        | 395  | 20.3 | 790  | 20.8 |
| 5 (high)                                 | 334  | 17.1 | 722  | 19.0 |
| missing                                  | 22   | 1.1  | 53   | 1.4  |

ADL: activities of daily living, IADL: instrumental activities of daily living, ISCED: International Standard Classification of Education

Table 1: (continued)

|                                     | ADL  |      | IADL |      |
|-------------------------------------|------|------|------|------|
|                                     | N    | %    | N    | %    |
| <b>Employment</b>                   |      |      |      |      |
| employed                            | 257  | 13.2 | 600  | 15.8 |
| unemployed                          | 32   | 1.6  | 70   | 1.8  |
| retired                             | 1487 | 76.3 | 2797 | 73.6 |
| permanently disabled                | 121  | 6.2  | 211  | 5.6  |
| doing housework                     | 26   | 1.3  | 66   | 1.7  |
| not working for other reasons       | 26   | 1.3  | 54   | 1.4  |
| missing                             | 0    | 0.0  | 3    | 0.1  |
| <b>Main earner in the household</b> |      |      |      |      |
| myself                              | 1369 | 70.2 | 2518 | 66.2 |
| there is no main breadwinner        | 281  | 14.4 | 546  | 14.4 |
| my partner                          | 287  | 14.7 | 712  | 18.7 |
| missing                             | 12   | 0.6  | 25   | 0.7  |
| <b>Marital status</b>               |      |      |      |      |
| single                              | 201  | 10.3 | 370  | 9.7  |
| married                             | 856  | 43.9 | 1804 | 47.5 |
| widowed                             | 626  | 32.1 | 1131 | 29.8 |
| divorced                            | 265  | 13.6 | 492  | 12.9 |
| missing                             | 1    | 0.1  | 4    | 0.1  |
| <b>Living with partner</b>          |      |      |      |      |
| yes                                 | 852  | 43.7 | 1811 | 47.6 |
| no                                  | 1091 | 56.0 | 1975 | 52.0 |
| missing                             | 6    | 0.3  | 15   | 0.4  |
| <b>People in household</b>          |      |      |      |      |
| 1                                   | 1011 | 51.9 | 1831 | 48.2 |
| 2                                   | 826  | 42.4 | 1711 | 45.0 |
| 3                                   | 74   | 3.8  | 180  | 4.7  |
| 4                                   | 22   | 1.1  | 41   | 1.1  |
| 5                                   | 9    | 0.5  | 21   | 0.6  |
| 6                                   | 3    | 0.2  | 8    | 0.2  |
| 7 or more                           | 2    | 0.1  | 4    | 0.1  |
| missing                             | 2    | 0.1  | 5    | 0.1  |
| <b>Health insurance type</b>        |      |      |      |      |
| statutory health insurance          | 1676 | 86.0 | 3219 | 84.7 |
| private health insurance            | 258  | 13.2 | 556  | 14.6 |
| other                               | 11   | 0.6  | 21   | 0.6  |
| missing                             | 4    | 0.2  | 5    | 0.1  |
| <b>Social support (Oslo-3)</b>      |      |      |      |      |
| low                                 | 457  | 23.4 | 763  | 20.1 |
| medium                              | 865  | 44.4 | 1717 | 45.2 |
| high                                | 523  | 26.8 | 1140 | 30.0 |
| missing                             | 104  | 5.3  | 181  | 4.8  |

ADL: activities of daily living, IADL: instrumental activities of daily living

Table 1: (continued)

|                                     | ADL  |      | IADL |      |
|-------------------------------------|------|------|------|------|
|                                     | N    | %    | N    | %    |
| <b>Time spent caring for others</b> |      |      |      |      |
| none                                | 1542 | 79.1 | 2933 | 77.2 |
| less than 10 hours per week         | 242  | 12.4 | 549  | 14.4 |
| min. 10 but max. 20 hours per week  | 87   | 4.5  | 168  | 4.4  |
| 20 hours per week or more           | 74   | 3.8  | 148  | 3.9  |
| missing                             | 4    | 0.2  | 3    | 0.1  |

ADL: activities of daily living, IADL: instrumental activities of daily living

Table 2: Numbers of observations and proportions of impairments of body function or structure (unweighted)

|                                | ADL  |      | IADL |      |
|--------------------------------|------|------|------|------|
|                                | N    | %    | N    | %    |
| <b>Hypertension</b>            |      |      |      |      |
| yes                            | 1183 | 60.7 | 2138 | 56.2 |
| no                             | 755  | 38.7 | 1642 | 43.2 |
| missing                        | 11   | 0.6  | 21   | 0.6  |
| <b>Myocardial infarction</b>   |      |      |      |      |
| yes                            | 98   | 5.0  | 165  | 4.3  |
| no                             | 1850 | 94.9 | 3635 | 95.6 |
| missing                        | 1    | 0.1  | 1    | 0.0  |
| <b>Coronary artery disease</b> |      |      |      |      |
| yes                            | 338  | 17.3 | 545  | 14.3 |
| no                             | 1568 | 80.5 | 3187 | 83.8 |
| missing                        | 43   | 2.2  | 69   | 1.8  |
| <b>Stroke</b>                  |      |      |      |      |
| yes                            | 134  | 6.9  | 201  | 5.3  |
| no                             | 1814 | 93.1 | 3597 | 94.6 |
| missing                        | 1    | 0.1  | 3    | 0.1  |
| <b>Diabetes</b>                |      |      |      |      |
| yes                            | 473  | 24.3 | 795  | 20.9 |
| no                             | 1469 | 75.4 | 2997 | 78.8 |
| missing                        | 7    | 0.4  | 9    | 0.2  |
| <b>Asthma</b>                  |      |      |      |      |
| yes                            | 226  | 11.6 | 442  | 11.6 |
| no                             | 1714 | 87.9 | 3350 | 88.1 |
| missing                        | 9    | 0.5  | 9    | 0.2  |
| <b>Hypolipoproteinaemia</b>    |      |      |      |      |
| yes                            | 774  | 39.7 | 1424 | 37.5 |
| no                             | 1100 | 56.4 | 2247 | 59.1 |
| missing                        | 75   | 3.8  | 130  | 3.4  |
| <b>Chronic bronchitis</b>      |      |      |      |      |
| yes                            | 316  | 16.2 | 568  | 14.9 |
| no                             | 1623 | 83.3 | 3215 | 84.6 |
| missing                        | 10   | 0.5  | 18   | 0.5  |
| <b>Liver cirrhosis</b>         |      |      |      |      |
| yes                            | 30   | 1.5  | 43   | 1.1  |
| no                             | 1907 | 97.8 | 3740 | 98.4 |
| missing                        | 12   | 0.6  | 18   | 0.5  |
| <b>Chronic kidney disease</b>  |      |      |      |      |
| yes                            | 168  | 8.6  | 259  | 6.8  |
| no                             | 1769 | 90.8 | 3529 | 92.8 |
| missing                        | 12   | 0.6  | 13   | 0.3  |

ADL: activities of daily living, IADL: instrumental activities of daily living

Table 2: (continued)

|                                             | ADL                    |      | IADL                   |      |
|---------------------------------------------|------------------------|------|------------------------|------|
|                                             | N                      | %    | N                      | %    |
| <b>Urinary incontinence</b>                 |                        |      |                        |      |
| yes                                         | 617                    | 31.7 | 927                    | 24.4 |
| no                                          | 1325                   | 68.0 | 2865                   | 75.4 |
| missing                                     | 7                      | 0.4  | 9                      | 0.2  |
| <b>Any allergy</b>                          |                        |      |                        |      |
| yes                                         | 562                    | 28.8 | 1120                   | 29.5 |
| no                                          | 1377                   | 70.7 | 2664                   | 70.1 |
| missing                                     | 10                     | 0.5  | 17                     | 0.4  |
| <b>Arthrosis</b>                            |                        |      |                        |      |
| yes                                         | 1034                   | 53.1 | 1722                   | 45.3 |
| no                                          | 877                    | 45.0 | 2020                   | 53.1 |
| missing                                     | 38                     | 1.9  | 59                     | 1.6  |
| <b>Complaints of neck or cervical spine</b> |                        |      |                        |      |
| yes                                         | 1291                   | 66.2 | 2254                   | 59.3 |
| no                                          | 658                    | 33.8 | 1536                   | 40.4 |
| missing                                     | 8                      | 0.4  | 11                     | 0.3  |
| <b>Complaints of lower back</b>             |                        |      |                        |      |
| yes                                         | 859                    | 44.1 | 1543                   | 40.6 |
| no                                          | 1092                   | 56.0 | 2246                   | 59.1 |
| missing                                     | 6                      | 0.3  | 12                     | 0.3  |
| <b>Injury due to traffic accident</b>       |                        |      |                        |      |
| yes                                         | 33                     | 1.7  | 60                     | 1.6  |
| no                                          | 1914                   | 98.2 | 3739                   | 98.4 |
| missing                                     | 2                      | 0.1  | 2                      | 0.1  |
| <b>Injury due to home accident</b>          |                        |      |                        |      |
| yes                                         | 235                    | 12.1 | 358                    | 9.4  |
| no                                          | 1711                   | 87.8 | 3440                   | 90.5 |
| missing                                     | 3                      | 0.2  | 3                      | 0.1  |
| <b>Injury due to accident in free time</b>  |                        |      |                        |      |
| yes                                         | 140                    | 7.2  | 216                    | 5.7  |
| no                                          | 1807                   | 92.7 | 3583                   | 94.3 |
| missing                                     | 2                      | 0.1  | 2                      | 0.1  |
| <b>Depression (PHQ-8)</b>                   |                        |      |                        |      |
| Continuous score                            | Mean (SD): 5.85 (4.56) |      | Mean (SD): 5.05 (4.26) |      |
| missing                                     | 99 (5.1%)              |      | 160 (4.2%)             |      |
| <b>Severity of pain</b>                     |                        |      |                        |      |
| no pain                                     | 198                    | 10.2 | 669                    | 17.6 |
| very mild                                   | 84                     | 4.3  | 225                    | 5.9  |
| mild                                        | 367                    | 18.8 | 833                    | 21.9 |
| moderate                                    | 577                    | 29.6 | 1047                   | 27.5 |
| severe                                      | 524                    | 26.9 | 771                    | 20.3 |
| very severe                                 | 193                    | 9.9  | 246                    | 6.5  |
| missing                                     | 6                      | 0.3  | 10                     | 0.3  |

ADL: activities of daily living, IADL: instrumental activities of daily living, PHQ-8: Patient Health Questionnaire 8

Table 2: (continued)

|                                 | ADL  |      | IADL |      |
|---------------------------------|------|------|------|------|
|                                 | N    | %    | N    | %    |
| <b>Visual difficulty</b>        |      |      |      |      |
| none with visual aid            | 1075 | 55.2 | 2270 | 59.7 |
| difficulties with visual aid    | 583  | 29.9 | 1024 | 26.9 |
| difficulties without visual aid | 107  | 5.5  | 171  | 4.5  |
| none without visual aid         | 115  | 5.9  | 227  | 6.0  |
| missing                         | 69   | 3.5  | 109  | 2.9  |
| <b>Hearing difficulty</b>       |      |      |      |      |
| none                            | 833  | 42.7 | 1714 | 45.1 |
| moderate                        | 844  | 43.3 | 1663 | 43.8 |
| severe                          | 272  | 14.0 | 422  | 11.1 |
| missing                         | 0    | 0.0  | 2    | 0.1  |

ADL: activities of daily living, IADL: instrumental activities of daily living
